# Supplementary material
Source: PubMed Central journal article supplement (PMC2823090)

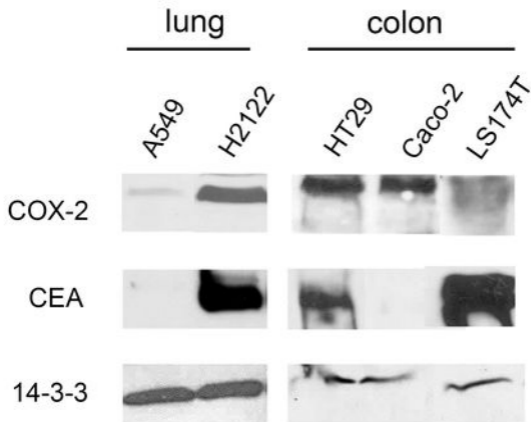

Supplementary Figure 1 Li, H-J

Supplement: NIHMS79495-supplement-3.pdf [file NIHMS79495-supplement-3.pdf]

**A**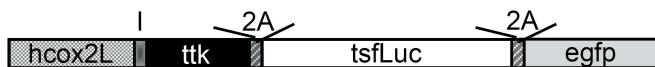**B**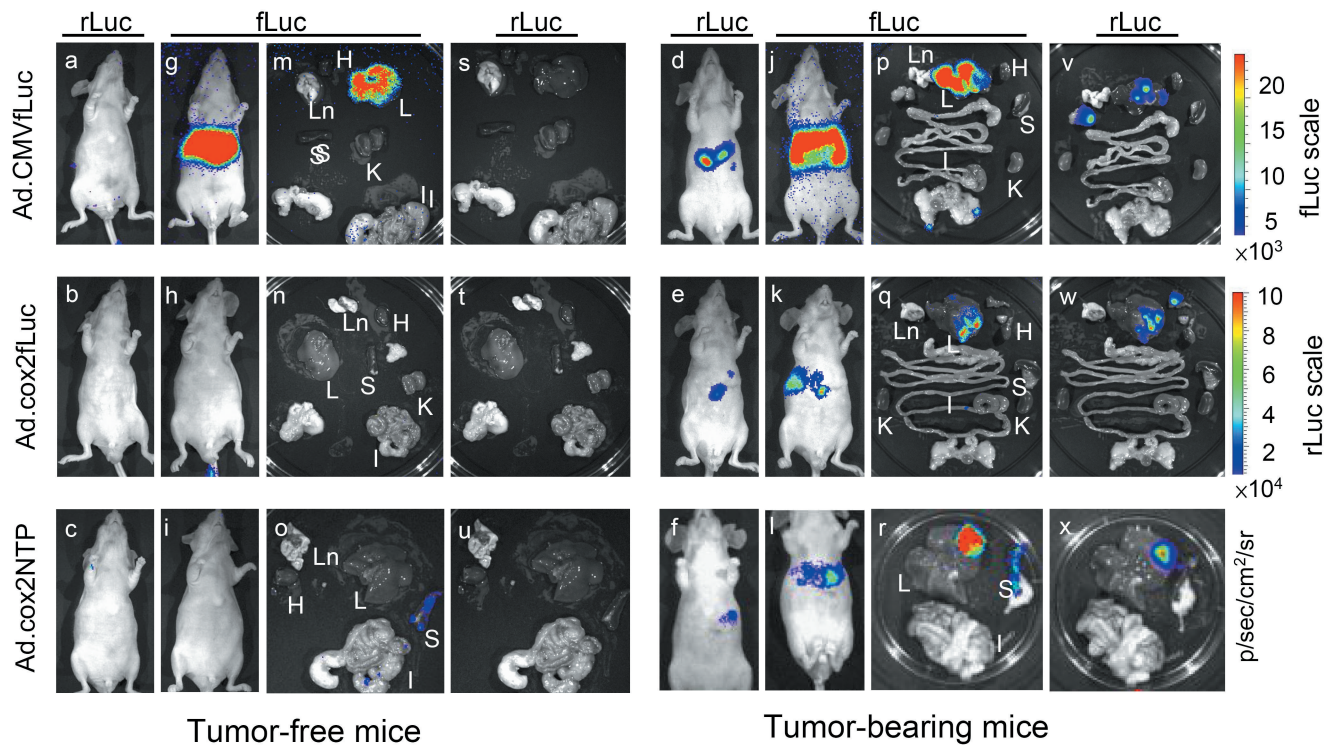

Supplementary Figure 2 Li, H-J

Supplement: NIHMS79495-supplement-4.pdf [file NIHMS79495-supplement-4.pdf]

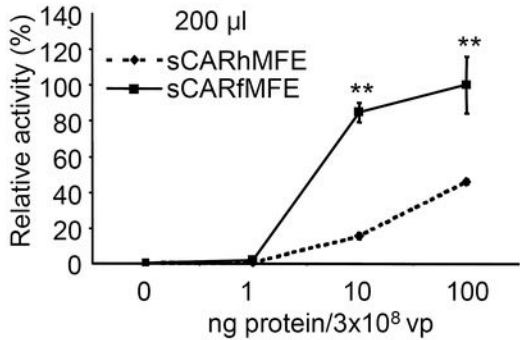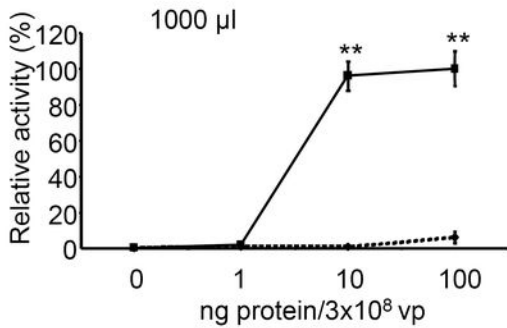

Supplementary Figure 3 Li, H-J

Supplement: NIHMS79495-supplement-5.pdf [file NIHMS79495-supplement-5.pdf]
